# Supplementary material for: Ankk1 Loss of Function Disrupts Dopaminergic Pathways in Zebrafish
Source: PubMed Central journal article supplement (PMC8861280; doi:10.3389/fnins.2022.794653), 2022-02-08
Supplement: Image_2.pdf [file Image_2.pdf]

anti-drd2

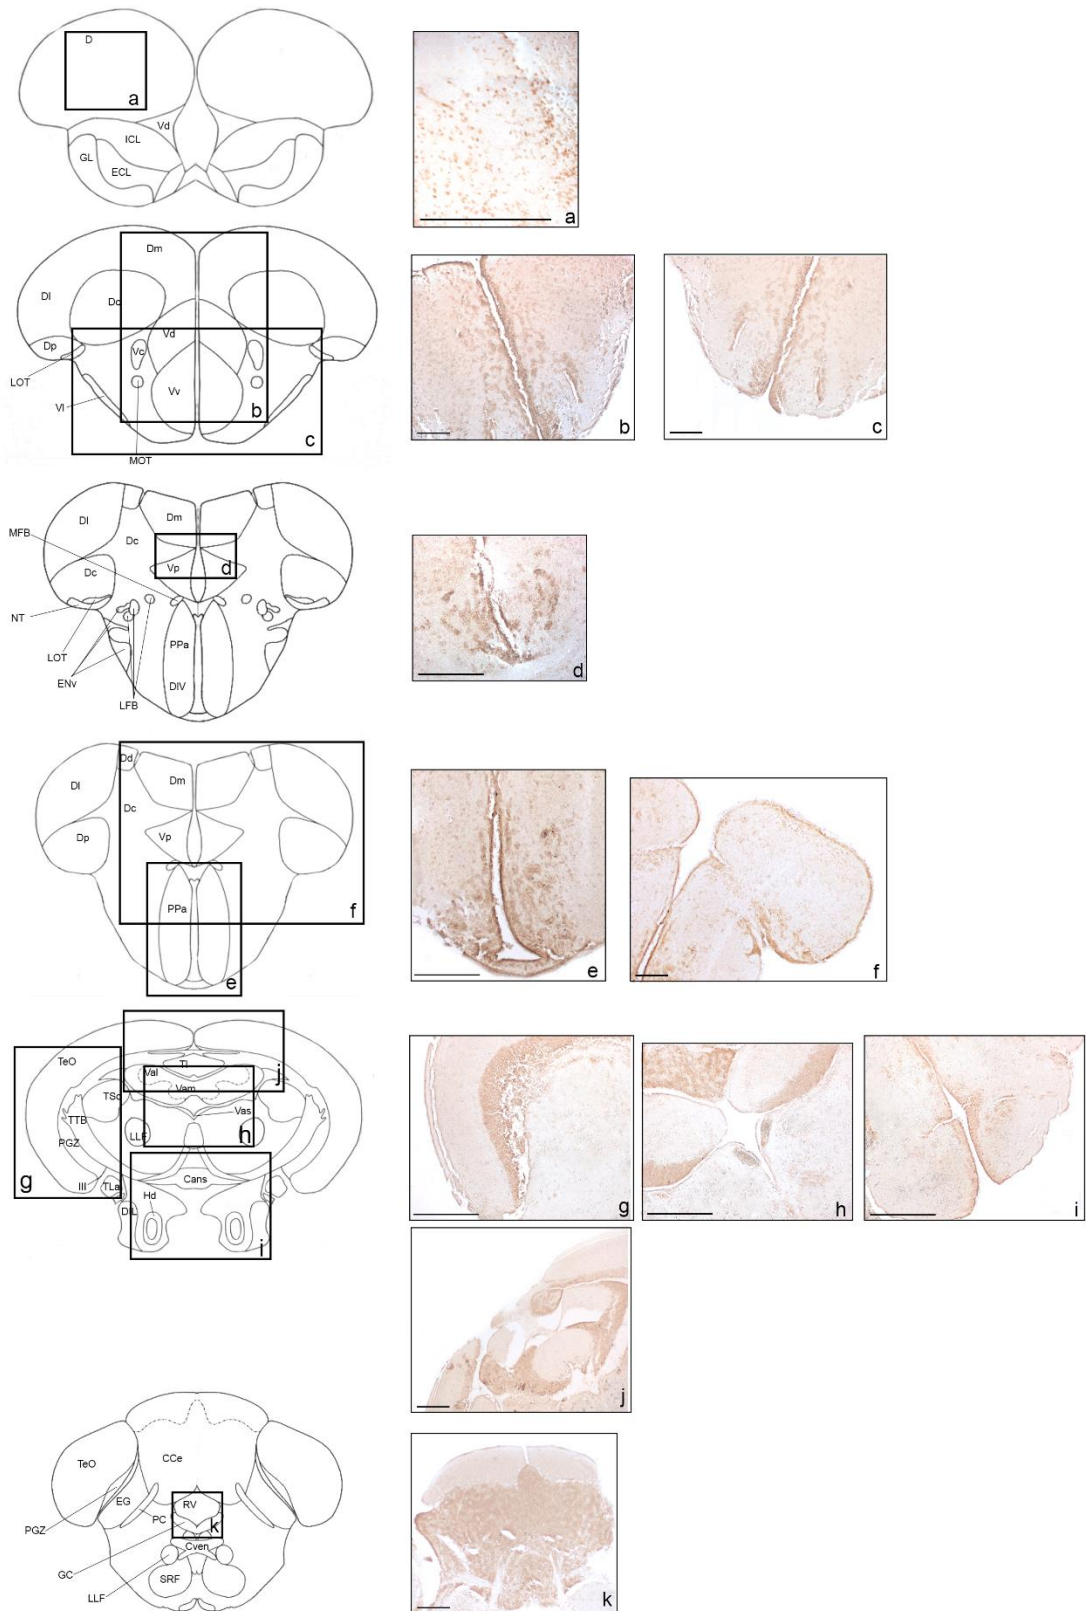

**Supplementary Figure 2. Drd2 immunohistochemistry in adult wild type zebrafish brain.** On the right, drd2 protein distribution in transverse brain sections. On the left, schematic depiction of zebrafish brain, transversal section (adapted from Wullimann *et al.*, 1996). **(a-f)**

Positive staining in the forebrain; **(g-j)** positive staining in the midbrain; **(k)** positive staining in the hindbrain. Scale bars: c, f, j, k, 50  $\mu\text{m}$ ; d, e, g, h, i, 100  $\mu\text{m}$ ; a, b, 200  $\mu\text{m}$ . Abbreviations: III, oculomotor nerve; Cans, commissura ansulata; D, dorsal telencephalic area; Dc, central zone of D; Dd, dorsal zone of D; DIL, diffuse nucleus of the inferior lobe; Dl, lateral zone of D; Dm, medial zone of D; Dp, posterior zone of D; DV, descending trigeminal root; ECL, external cellular layer of olfactory bulb including mitral cells; GC, central griseum; GL, glomerular layer of olfactory bulb; Hd, dorsal hypothalamus; IAF, inner arcuate fibers; IMRF, intermediate reticular formation; ICL, internal cellular layer of olfactory bulb; LLF, lateral longitudinal fascicle; MaON, magnocellular octaval nucleus; PGZ, periventricular gray zone of the optic tectum; PPa, parvocellular preoptic nucleus, anterior part; SO, secondary octaval population; TelV, telencephalic ventricle; TeO, optic tectum; Tl, torus longitudinalis; TLa, torus lateralis; TSc, central nucleus of torus semicircularis; TTB, tractus tectobulbaris; Val, lateral division of valvula cerebelli; Vam, medial division of valvula cerebelli; Vas, vascular lacuna of area postrema; Vd, dorsal nucleus of ventral telencephalic area; Vp, posterior nucleus of ventral telencephalic area; Vv, ventral nucleus of ventral telencephalic area; *VII*s, sensory root of the facial nerve.
