# Supplementary material for: Ankk1 Loss of Function Disrupts Dopaminergic Pathways in Zebrafish
Source: PubMed Central journal article supplement (PMC8861280; doi:10.3389/fnins.2022.794653), 2022-02-08
Supplement: Image_3.pdf [file Image_3.pdf]

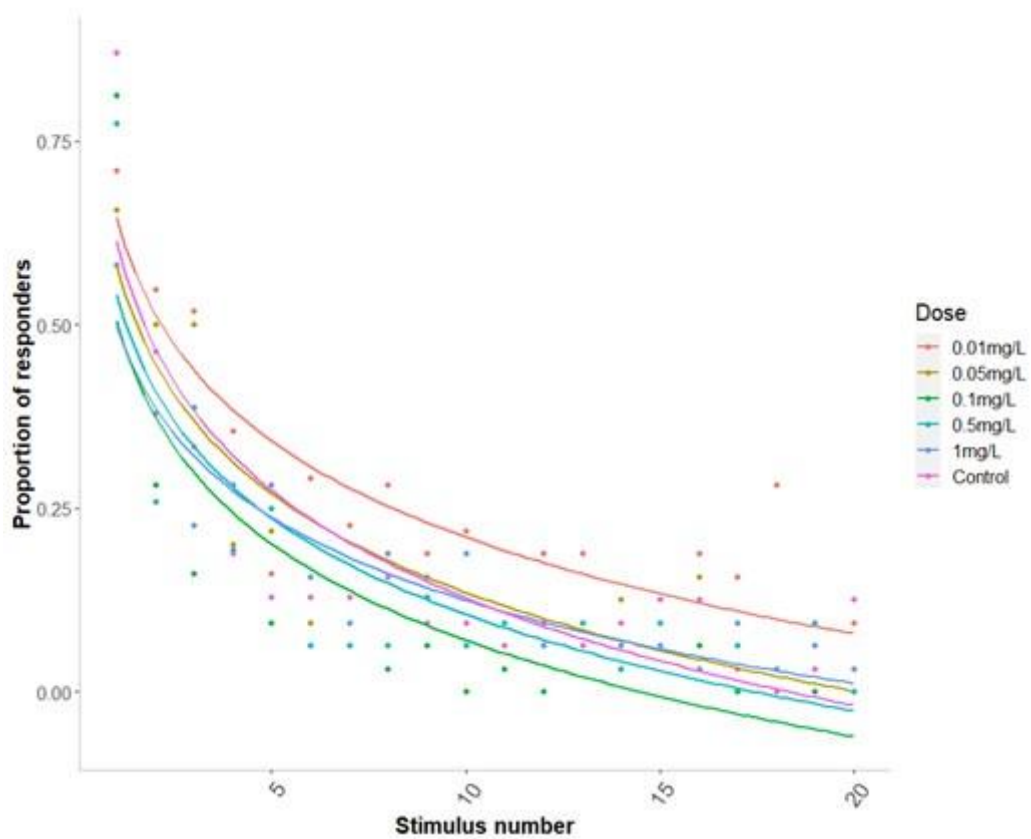

**Supplementary Figure 3. Habituation response of wild type fish in the presence and absence of amisulpride.** Dose response curve showing the habituation rate to repeated acoustic stimuli (startles) on 5 days post fertilization wild type fish using six different doses of amisulpride. N = 32 per group.
