# Supplementary material for: Ankk1 Loss of Function Disrupts Dopaminergic Pathways in Zebrafish
Source: PubMed Central journal article supplement (PMC8861280; doi:10.3389/fnins.2022.794653), 2022-02-08
Supplement: Table_1.pdf [file Table_1.pdf]

**Supplementary Table 1.** List of primers used for No-Go mRNA decay and qPCR analysis.

| Gene (purpose)                                                            | gene acronym  | Accession number                     | Sequence (5' to 3')                                                                       | Product size (bp) | Efficiency (%) | Source                                                                                          |
|---------------------------------------------------------------------------|---------------|--------------------------------------|-------------------------------------------------------------------------------------------|-------------------|----------------|-------------------------------------------------------------------------------------------------|
| actin, $\beta$ 2 (housekeeping)                                           | <i>actb2</i>  | NM_181601.5                          | Forward:<br>CGAGCTGTCTTCC<br>CATCCA<br>Reverse:<br>TCACCAACGTAG<br>CTGTCTTTCTG            | 86                | 95             | <a href="https://doi.org/10.3389/fnbeh.2015.00271">https://doi.org/10.3389/fnbeh.2015.00271</a> |
| ribosomal protein L13a (housekeeping)                                     | <i>rpl13a</i> | NM_212784.1                          | Forward:<br>TCTGGAGGACTG<br>TAAGAGGTATGC<br>Reverse:<br>AGACGCACAATC<br>TTGAGAGCAG        | 148               | 80             | <a href="https://doi.org/10.3389/fnbeh.2015.00271">https://doi.org/10.3389/fnbeh.2015.00271</a> |
| eukaryotic translation elongation factor 1 alpha 1, like 1 (housekeeping) | <i>ef1</i>    | NM_131263.1                          | Forward:<br>CTGGAGGCCAGC<br>TGAAACAT<br>Reverse:<br>ATCAAGAAGAGT<br>AGTACCGCTAGC<br>ATTAC | 87                | 88.4           | <a href="https://doi.org/10.3389/fnbeh.2015.00271">https://doi.org/10.3389/fnbeh.2015.00271</a> |
| ankyrin repeat and kinase domain containing 1                             | <i>ankk1</i>  | NM_001130665.1                       | Forward:<br>CCTGAGTGCAG<br>GACATGAT<br>Reverse:<br>CTGTTCAGGCAG<br>ACGCTTTC               | 168               | 91.85          | own produced                                                                                    |
| dopamine receptor receptor 1 (dopaminergic system)                        | <i>drd1</i>   | NM_001135976.2                       | Forward:<br>TGGTTCCTTTCTG<br>CAACCCA<br>Reverse:<br>AGTGATGAGTTC<br>GCCCAACC              | 100               | 84.3           | <a href="https://doi.org/10.7554/eLife.51295">https://doi.org/10.7554/eLife.51295</a>           |
| dopamine receptor receptor 2a (dopaminergic system)                       | <i>drd2a</i>  | XM_009291617.3 and<br>XM_005157501.4 | Forward:<br>TCCACAAAATCA<br>GGAAAAGCGT<br>Reverse:<br>CAGCCAATGTAA<br>ACCGCAA             | 106               | 100.17         | <a href="https://doi.org/10.7554/eLife.51295">https://doi.org/10.7554/eLife.51295</a>           |

|                                                     |               |                                      |                                                                                        |     |        |                                                                                                     |
|-----------------------------------------------------|---------------|--------------------------------------|----------------------------------------------------------------------------------------|-----|--------|-----------------------------------------------------------------------------------------------------|
| dopamine receptor receptor 2b (dopaminergic system) | <i>drd2b</i>  | NM_197936.1                          | Forward:<br>GCACGGCCAGCA<br>TTCTTAATC<br>Reverse:<br>GAAAGCACCCAA<br>ACAACGGA          | 136 | 98.6   | own produced                                                                                        |
| dopamine receptor receptor 3 (dopaminergic system)  | <i>drd3</i>   | XM_021470111.1 and<br>XM_005162673.4 | Forward:<br>ATCGAGTTTCGC<br>AGAGCCTT<br>Reverse:<br>TCCACAGTGTCTG<br>AAAGCCG           | 95  | 91.09  | <a href="https://doi.org/10.7554/eLife.51295">https://doi.org/10.7554/eLife.51295</a>               |
| dopamine receptor receptor 4a (dopaminergic system) | <i>drd4a</i>  | NM_001012616.3                       | Forward:<br>GCCTCTTTCCCAT<br>CTCACAG<br>Reverse:<br>CTCAGACACACC<br>AGCACGTT           | 281 | 93.56  | <a href="https://doi.org/10.1016/j.cbpc.2017.01.010">https://doi.org/10.1016/j.cbpc.2017.01.010</a> |
| dopamine receptor receptor 4b (dopaminergic system) | <i>drd4b</i>  | NM_001012618.1                       | Forward:<br>AGACCCCAAGTGA<br>ATGCAA<br>Reverse:<br>AGTTTGGCTTTGC<br>GTGTT              | 150 | 109.8  | <a href="https://doi.org/10.1016/j.cbpc.2017.01.010">https://doi.org/10.1016/j.cbpc.2017.01.010</a> |
| dopamine receptor receptor 5 (dopaminergic system)  | <i>drd5</i>   | XM_003199767.5                       | Forward:<br>TCCAGCACAAAC<br>GCACAGAGAG<br>Reverse: TCC AGC<br>ACA CAC ACA<br>CAC ACA C | 156 | 89.51  | own produced                                                                                        |
| dopamine transporter (dopaminergic system)          | <i>slc6a3</i> | NM_131755.1                          | Forward:<br>GCCTGGTTTTACG<br>GAGTGGA<br>Reverse:<br>GGAGGATTGAAG<br>GTGGCGAA           | 152 | 118.34 | <a href="https://doi.org/10.7554/eLife.51295">https://doi.org/10.7554/eLife.51295</a>               |
| dopamine $\beta$ hydroxylase (dopaminergic system)  | <i>dbh</i>    | NM_001109694.2                       | Forward:<br>GAGGAGGTCAAG<br>AGGTGGAGG<br>Reverse:<br>CATCGCCTGGCAGAA<br>CAGTCAC        | 105 | 104.54 | own produced                                                                                        |
