# Supplementary material for: Ankk1 Loss of Function Disrupts Dopaminergic Pathways in Zebrafish
Source: PubMed Central journal article supplement (PMC8861280; doi:10.3389/fnins.2022.794653), 2022-02-08
Supplement: Table_2.pdf [file Table_2.pdf]

**Supplementary Table 2.** Statistics (log 10) for gene expression data.

| Gene name     | <i>ankk1</i> <sup>+/+</sup> |           | <i>ankk1</i> <sup>+/27ins</sup> |          | <i>ankk1</i> <sup>27ins/27ins</sup> |           | F (DFn, DFd)       | p                   |
|---------------|-----------------------------|-----------|---------------------------------|----------|-------------------------------------|-----------|--------------------|---------------------|
|               | Mean                        | SD        | Mean                            | SD       | Mean                                | SD        |                    |                     |
| <i>ankk1</i>  | 3.99351E-07                 | 0.5807945 | -4.91904                        | 1.610936 | -6.925562                           | 3.41016   | F (2, 11) = 13,86  | <b>0.001*</b>       |
| <i>drd1</i>   | -6.55651E-08                | 5.141269  | 6.199594                        | 2.550406 | -0.3409315                          | 0.8468519 | F (2, 11) = 5,336  | 0.024               |
| <i>drd2a</i>  | -4.05312E-07                | 2.04459   | 0.5226158                       | 1.439238 | -0.9210827                          | 1.731454  | F (2, 11) = 0,7566 | 0.4922              |
| <i>drd2b</i>  | 1.18613E-06                 | 0.8386233 | -0.2607388                      | 1.32328  | 5.354655                            | 0.6617051 | F (2, 11) = 42,56  | <b>&lt; 0,0001*</b> |
| <i>drd3</i>   | -1.39475E-06                | 0.7111623 | 0.3791922                       | 1.215033 | -3.205326                           | 6.092118  | F (2, 11) = 1,535  | 0.2582              |
| <i>drd4a</i>  | 1.43051E-06                 | 4.102798  | 1.682233                        | 2.357038 | -0.5451202                          | 0.7565644 | F (2, 11) = 0,7572 | 0.4919              |
| <i>drd4b</i>  | 4.52995E-07                 | 2.643887  | -1.410188                       | 2.102053 | -5.62743                            | 5.208304  | F (2, 11) = 3,213  | 0.0796              |
| <i>drd5</i>   | 5.48363E-07                 | 4.678932  | -2.098101                       | 3.161005 | -4.780843                           | 2.992601  | F (2, 11) = 1,809  | 0.2093              |
| <i>slc6a3</i> | -3.57628E-07                | 3.790946  | 1.426936                        | 2.386752 | -0.6109747                          | 1.874648  | F (2, 11) = 0,6118 | 0.5598              |
| <i>dbh</i>    | -4.05312E-07                | 1.873834  | 0.903142                        | 1.067044 | 0.6820229                           | 2.032615  | F (2, 11) = 0,3888 | 0.6868              |

**Legend:** \* significant effects.
