# Supplementary material for: Ankk1 Loss of Function Disrupts Dopaminergic Pathways in Zebrafish
Source: PubMed Central journal article supplement (PMC8861280; doi:10.3389/fnins.2022.794653), 2022-02-08
Supplement: Table_3.pdf [file Table_3.pdf]

**Supplementary Table 3.** P value adjustment for qPCR on 5dpf zebrafish larvae: Tukey method for multiple comparisons within groups with *emmeans* R package (R Core Team, 2017).

| <b>Gene: <i>ankk1</i> (larvae)</b> |                 |           |           |                |                |
|------------------------------------|-----------------|-----------|-----------|----------------|----------------|
| <b>Contrast</b>                    | <b>Estimate</b> | <b>SE</b> | <b>Df</b> | <b>t.ratio</b> | <b>p.value</b> |
| WT - HOM                           | 6.926           | 1.85      | 110       | 3.737          | 0.0009         |
| WT - HET                           | 4.919           | 1.75      | 110       | 2.816          | 0.0158         |
| HOM -HET                           | -2.007          | 1.85      | 110       | -1.083         | 0.5267         |
| <b>Gene: <i>dat</i> (larvae)</b>   |                 |           |           |                |                |
| <b>Contrast</b>                    | <b>Estimate</b> | <b>SE</b> | <b>Df</b> | <b>t.ratio</b> | <b>p.value</b> |
| WT - HOM                           | 0.611           | 1.85      | 110       | 0.330          | 0.9417         |
| WT - HET                           | -1.427          | 1.75      | 110       | -0.817         | 0.6935         |
| HOM -HET                           | -2.038          | 1.85      | 110       | -1.100         | 0.5163         |
| <b>Gene: <i>dbh</i> (larvae)</b>   |                 |           |           |                |                |
| <b>Contrast</b>                    | <b>Estimate</b> | <b>SE</b> | <b>Df</b> | <b>t.ratio</b> | <b>p.value</b> |
| WT - HOM                           | -0.682          | 1.85      | 110       | -0.368         | 0.9281         |
| WT - HET                           | -0.903          | 1.75      | 110       | -0.517         | 0.8633         |
| HOM -HET                           | -0.221          | 1.85      | 110       | -0.119         | 0.9922         |
| <b>Gene: <i>drd1</i> (larvae)</b>  |                 |           |           |                |                |
| <b>Contrast</b>                    | <b>Estimate</b> | <b>SE</b> | <b>Df</b> | <b>t.ratio</b> | <b>p.value</b> |
| WT - HOM                           | 0.341           | 1.85      | 110       | 0.184          | 0.9815         |
| WT - HET                           | -6.200          | 1.75      | 110       | -3.548         | 0.0016         |
| HOM -HET                           | -6.541          | 1.85      | 110       | -3.530         | 0.0018         |
| <b>Gene: <i>drd2a</i> (larvae)</b> |                 |           |           |                |                |
| <b>Contrast</b>                    | <b>Estimate</b> | <b>SE</b> | <b>Df</b> | <b>t.ratio</b> | <b>p.value</b> |
| WT - HOM                           | 0.921           | 1.85      | 110       | 0.497          | 0.8729         |
| WT - HET                           | -0.523          | 1.75      | 110       | -0.299         | 0.9519         |
| HOM -HET                           | -1.444          | 1.85      | 110       | -0.779         | 0.7166         |
| <b>Gene: <i>drd2b</i> (larvae)</b> |                 |           |           |                |                |
| <b>Contrast</b>                    | <b>Estimate</b> | <b>SE</b> | <b>Df</b> | <b>t.ratio</b> | <b>p.value</b> |
| WT - HOM                           | -5.355          | 1.85      | 110       | -2.890         | 0.0128         |
| WT - HET                           | 0.216           | 1.75      | 110       | 0.149          | 0.9878         |
| HOM -HET                           | 5.615           | 1.85      | 110       | 3.030          | 0.0085         |
| <b>Gene: <i>drd3</i> (larvae)</b>  |                 |           |           |                |                |
| <b>Contrast</b>                    | <b>Estimate</b> | <b>SE</b> | <b>Df</b> | <b>t.ratio</b> | <b>p.value</b> |
| WT - HOM                           | 3.205           | 1.85      | 110       | 1.730          | 0.1988         |
| WT - HET                           | -0.379          | 1.75      | 110       | -0.217         | 0.9744         |
| HOM -HET                           | -3.585          | 1.85      | 110       | -1.934         | 0.1339         |
| <b>Gene: <i>drd4a</i> (larvae)</b> |                 |           |           |                |                |
| <b>Contrast</b>                    | <b>Estimate</b> | <b>SE</b> | <b>Df</b> | <b>t.ratio</b> | <b>p.value</b> |
| WT - HOM                           | 0.545           | 1.85      | 110       | 0.294          | 0.9534         |
| WT - HET                           | -1.682          | 1.75      | 110       | -0.963         | 0.6018         |
| HOM -HET                           | -2.227          | 1.85      | 110       | -1.202         | 0.4546         |
| <b>Gene: <i>drd4b</i> (larvae)</b> |                 |           |           |                |                |
| <b>Contrast</b>                    | <b>Estimate</b> | <b>SE</b> | <b>Df</b> | <b>t.ratio</b> | <b>p.value</b> |
| WT - HOM                           | 5.627           | 1.85      | 110       | 3.037          | 0.0083         |
| WT - HET                           | 1.410           | 1.75      | 110       | 0.807          | 0.6994         |
| HOM -HET                           | -4.217          | 1.85      | 110       | -2.276         | 0.0635         |
| <b>Gene: <i>drd5</i> (larvae)</b>  |                 |           |           |                |                |
| <b>Contrast</b>                    | <b>Estimate</b> | <b>SE</b> | <b>Df</b> | <b>t.ratio</b> | <b>p.value</b> |
| WT - HOM                           | 4.781           | 1.85      | 110       | 2.580          | 0.0299         |
| WT - HET                           | 2.098           | 1.75      | 110       | 1.201          | 0.4552         |
| HOM -HET                           | -2.683          | 1.85      | 110       | -1.448         | 0.3202         |
| <b>Gene: <i>drd2a</i> (adult)</b>  |                 |           |           |                |                |
| <b>Contrast</b>                    | <b>Estimate</b> | <b>SE</b> | <b>Df</b> | <b>t.ratio</b> | <b>p.value</b> |
| WT - HOM                           | -1.928          | 1.88      | 30        | -1.027         | 0.5657         |

|                                   |                 |           |           |                |                |
|-----------------------------------|-----------------|-----------|-----------|----------------|----------------|
| WT - HET                          | -1.141          | 1.88      | 30        | -0.608         | 0.8170         |
| HOM -HET                          | 0.788           | 1.88      | 30        | 0.420          | 0.9078         |
| <b>Gene: <i>drd2b</i> (adult)</b> |                 |           |           |                |                |
| <b>Contrast</b>                   | <b>Estimate</b> | <b>SE</b> | <b>Df</b> | <b>t.ratio</b> | <b>p.value</b> |
| WT - HOM                          | -8.232          | 1.88      | 30        | -4.386         | 0.0004         |
| WT - HET                          | -4.127          | 1.88      | 30        | -2.199         | 0.0877         |
| HOM -HET                          | 4.104           | 1.88      | 30        | 2.187          | 0.0899         |
